# Supplementary material
Source: PubMed Central journal article supplement (PMC3975047)
Supplement: NIHMS551128-supplement-2.pdf [file NIHMS551128-supplement-2.pdf]

| UPIN    | DX  | Source | Blast (%) | Status                          | Cyto-genetics                      | Molecular Mutations |             |             |            |                            | ABT-199 IC50 (nM) | ABT-737 IC50 (nM) | ABT-263 IC50 (nM) |
|---------|-----|--------|-----------|---------------------------------|------------------------------------|---------------------|-------------|-------------|------------|----------------------------|-------------------|-------------------|-------------------|
|         |     |        |           |                                 |                                    | <i>NPM1</i>         | <i>FLT3</i> | <i>NRAS</i> | <i>JAK</i> | Others                     |                   |                   |                   |
| 3841772 | AML | PB     | 57        | Relapsed Refractory, post-2 SCT | Complex                            | -                   | -           | -           | -          | -                          | 356.2             | 63.3              | -                 |
| 4031144 | AML | PB     | 98        | Primary Refractory              | -3, +8                             | -                   | -           | + (G12D)    | -          | -                          | 0.8               | 2.5               | -                 |
| 3891338 | AML | PB     | 71        | Primary Refractory              | inv(3)                             | -                   | -           | + (G13R)    | -          | -                          | 0.6               | 1.2               | -                 |
| 4081468 | AML | PB     | 86        | Pre-treatment                   | Complex incl -5, -7                | U                   | -           | U           | U          | U                          | 7.5               | 9.2               | -                 |
|         |     | BM     | 69        |                                 |                                    |                     |             |             |            |                            | 0.5               | 1.8               | -                 |
| 4081654 | AML | PB     | 99        | Relapsed Refractory             | del(3q)                            | +                   | -           | -           | -          | <i>K-RAS, GATA2, RUNX1</i> | 1.9               | 7.4               | -                 |
| 4030094 | AML | PB     | 98        | Primary Refractory              | t(9;11) and other                  | -                   | -           | -           | -          | <i>CEBPA</i>               | 84.8              | 179.3             | -                 |
| 2422940 | AML | BM     | 80        | Refractory                      | inv(3)                             | -                   | -           | -           | -          | -                          | 0.6               | 1.7               | -                 |
| 4031936 | AML | PB     | 99        | Relapsed Refractory             | inv(3)                             | -                   | +           | -           | -          | <i>IDH1</i>                | 0.5               | 3.1               | -                 |
| 3913992 | AML | PB     | 82        | Primary Refractory              | -                                  | -                   | -           | -           | -          | -                          | 6530.3            | 238.5             | -                 |
| 3831282 | AML | PB     | 78        | Primary Refractory              | -                                  | -                   | -           | -           | -          | -                          | 0.9               | 3.5               | -                 |
| 3788196 | AML | PB     | 85        | Primary Refractory              | -                                  | -                   | -           | -           | -          | -                          | 1.1               | 4.2               | -                 |
| 3873322 | AML | PB     | 98        | Primary Refractory Post-SCT     | -                                  | -                   | +           | -           | -          | -                          | 1.2               | 2.1               | -                 |
| 3686032 | AML | PB     | 52        | New AML from CMML               | -                                  | -                   | -           | +           | -          | -                          | 1.6               | 4.6               | -                 |
| 3846024 | AML | BM     | 99        | Relapsed Refractory             | -                                  | -                   | -           | -           | -          | -                          | 0.9               | 5.8               | -                 |
| 4015568 | AML | PB     | 87        | New therapy-related AML         | t(9;11)                            | -                   | -           | +           | -          | -                          | 1.4               | 14.8              | -                 |
| 3866160 | AML | BM     | 77        | Relapsed post-SCT               | Diploid                            | +                   | -           | -           | -          | <i>DNMT3</i>               | 1209.5            | 308.4             | -                 |
| 3798414 | AML | PB     | 99        | AML from MDS, refractory        | del(12p)                           | -                   | -           | +           | -          | -                          | 1.7               | 3.4               | -                 |
| 3871344 | AML | PB     | 69        | Refractory AMML                 | Diploid                            | -                   | -           | -           | -          | -                          | 0.6               | 2.4               | -                 |
| 3898404 | AML | PB     | 55        | AML from MDS                    | del(5q), -7                        | -                   | -           | +           | -          | -                          | 4.3               | 16.2              | -                 |
| 3899418 | AML | PB     | 81        | Relapsed                        | Diploid                            | +                   | -           | -           | -          | <i>DNMT3</i>               | 2.7               | 6                 | -                 |
| 3899936 | AML | PB     | 74        | AML from MDS                    | N/A                                | -                   | -           | -           | -          | -                          | > 5000            | > 5000            | -                 |
| 3821772 | AML | PB     | 93        | Refractory, Relapsed post-SCT   | Complex                            | -                   | -           | -           | -          | <i>CEBPA</i>               | 3.9               | 21.8              | -                 |
| 5       | AML | PB     | 5         | Relapsed                        | trisomy 11                         | -                   | -           | U           | U          | -                          | 9.3               | -                 | 5.4               |
| 9       | AML | PB     | 10        | Relapsed AML from MDS           | normal                             | -                   | +           | U           | U          | -                          | 21.2              | -                 | 4.1               |
| 10      | AML | BM     | 83        | Pre-treatment                   | normal                             | +                   | +           | U           | U          | -                          | 43.5              | -                 | 4.2               |
| 13      | AML | BM     | 46        | Relapsed Refractory             | normal                             | +                   | +           | U           | U          | -                          | 20.7              | -                 | 28.1              |
| 15      | AML | BM     | 16        | AML from MDS                    | trisomy 8                          | -                   | -           | U           | U          | -                          | 139.3             | -                 | 347.5             |
| 16      | AML | PB     | 35        | relapsed AML                    | normal                             | +                   | +           | U           | U          | -                          | 19.9              | -                 | 5                 |
| 19      | AML | PB     | 75        | Relapsed Refractory             | Monosomy 7                         | U                   | -           | U           | U          | -                          | 88.7              | -                 | 11.7              |
| 30      | AML | BM     | 35        | Pre-treatment                   | MLL gene rearrangement             | -                   | -           | U           | U          | -                          | 219.3             | -                 | 148.6             |
| 31      | AML | BM     | 80        | Pre-treatment                   | Complex                            | -                   | -           | U           | U          | -                          | 0.6               | -                 | 0.7               |
| 33      | AML | BM     | 63        | Pre-treatment                   | normal                             | +                   | -           | U           | U          | -                          | 52.1              | -                 | 212.3             |
| 34      | AML | BM     | 80        | Pre-treatment                   | normal                             | +                   | +           | U           | U          | -                          | 9.4               | -                 | 8.5               |
| 35      | AML | PB     | 48        | Relapsed, Refractory            | normal                             | +                   | -           | U           | U          | -                          | 0.4               | -                 | 0.4               |
| 1002    | AML | BM     | 51        | Pre-treatment                   | t(16;16)                           | U                   | U           | U           | U          | -                          | 13                | -                 | 20.8              |
| 1003    | AML | BM     | 44        | Pre-treatment                   | normal                             | -                   | -           | U           | U          | -                          | 2.3               | -                 | 2.7               |
| 1005    | AML | BM     | 69        | Pre-treatment                   | inversion 16                       | -                   | +           | U           | U          | -                          | 1.3               | -                 | 2.8               |
| 1001    | AML | BM     | 88        | Pre-treatment                   | normal                             | U                   | +           | U           | U          | -                          | 168.3             | -                 | 11.1              |
| 1004    | AML | BM     | 78        | Pre-treatment                   | 46,XX,inv(16)(p13q22)[20]          | U                   | U           | U           | U          | -                          | 192.8             | -                 | 555.9             |
| 37      | AML | BM     | 79        | AML from MDS                    | normal                             | -                   | +           | U           | U          | -                          | 11.2              | -                 | 6.7               |
| 40      | AML | BM     | 73        | Relapsed Refractory             | complex                            | -                   | -           | U           | U          | -                          | 0.6               | -                 | 2.5               |
| 41      | AML | BM     | 13        | Pre-treatment                   | complex                            | -                   | +           | U           | U          | -                          | 124.2             | -                 | 123.6             |
| 44      | AML | BM     | 69        | Pre-treatment                   | normal                             | +                   | -           | U           | U          | -                          | 1.4               | -                 | 3.3               |
| 1006    | AML | BM     | U         | Pre-treatment                   | unknown                            | U                   | U           | U           | U          | -                          | 132.4             | -                 | 108.9             |
| 1009    | AML | BM     | 96        | Pre-treatment                   | unknown                            | +                   | -           | U           | U          | -                          | 75.7              | -                 | 31.8              |
| 1010    | AML | BM     | 93        | Pre-treatment                   | normal                             | -                   | -           | U           | U          | -                          | 8.3               | -                 | 2.2               |
| 1011    | AML | BM     | 94        | Pre-treatment                   | normal                             | -                   | +           | U           | U          | -                          | 28.1              | -                 | 2.3               |
| 1013    | AML | BM     | 88        | Pre-treatment                   | normal                             | U                   | +           | U           | U          | -                          | 2.3               | -                 | 3.1               |
| 1015    | AML | BM     | 65        | Pre-treatment                   | 46,XY[20].nuc ish(PML,RARA)x2[100] | U                   | +           | U           | U          | -                          | 16.3              | -                 | 24                |
| 1017    | AML | BM     | 61        | Pre-treatment                   | inv(16)(p13q22)[20]                | U                   | U           | U           | U          | -                          | 10.3              | -                 | 8.3               |
| 571     | AML | BM     | 94        | Pre-treatment                   | No info                            | U                   | U           | U           | U          | -                          | 43.8              | -                 | 9.3               |
| 958     | AML | BM     | 95        | Pre-treatment                   | No info                            | U                   | U           | U           | U          | -                          | 27.1              | -                 | 3                 |
| 1044    | AML | BM     | 93        | Pre-treatment                   | No info                            | U                   | U           | U           | U          | -                          | 43.1              | -                 | 10.4              |
| 2924    | AML | BM     | 91        | Pre-treatment                   | No info                            | U                   | U           | U           | U          | -                          | 10.8              | -                 | 1.1               |
| 1012    | AML | BM     | 53        | Pre-treatment                   | normal                             | +                   | -           | U           | U          | -                          | 321.4             | -                 | 2009.1            |
| 1019    | AML | BM     | 45        | Pre-treatment                   | normal                             | -                   | -           | U           | U          | -                          | 9.1               | -                 | 6.6               |
| 1014    | AML | BM     | 65        | Pre-treatment                   | normal                             | +                   | +           | U           | U          | -                          | 95.3              | -                 | 28.6              |
